# Supplementary material for: Bodipy-based chemosensors for highly sensitive and selective detection of Hg2+ ions
Source: Royal Society of Chemistry journal article supplement (doi:10.1039/c8nj04817g), 2018-01-01
Supplement: c8nj04817g1.pdf [file c8nj04817g1.pdf]

# New Journal of Chemistry

## Supporting Information

### Bodipy Based Chemosensors for Highly Sensitive and Selective Detection of Hg<sup>2+</sup> Ion

Wei Sun<sup>1</sup>, Rong Chen<sup>1</sup>, Xinjian Cheng<sup>1\*</sup>, and Luninita Marin<sup>2\*</sup>

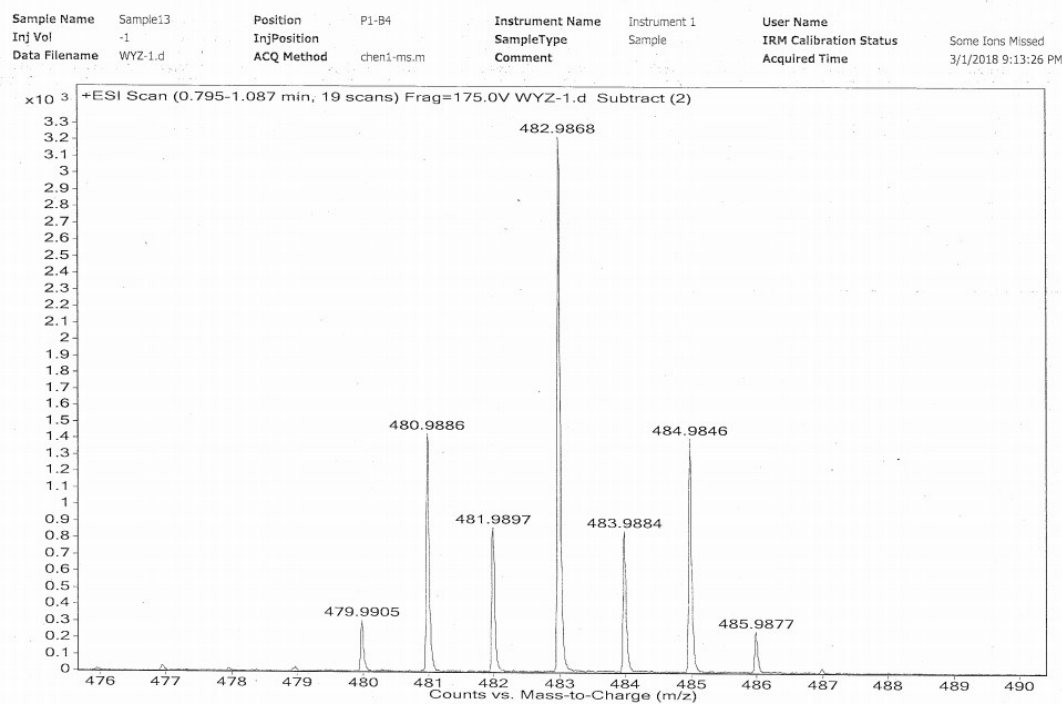

Fig. S1 Mass spectrum of B1

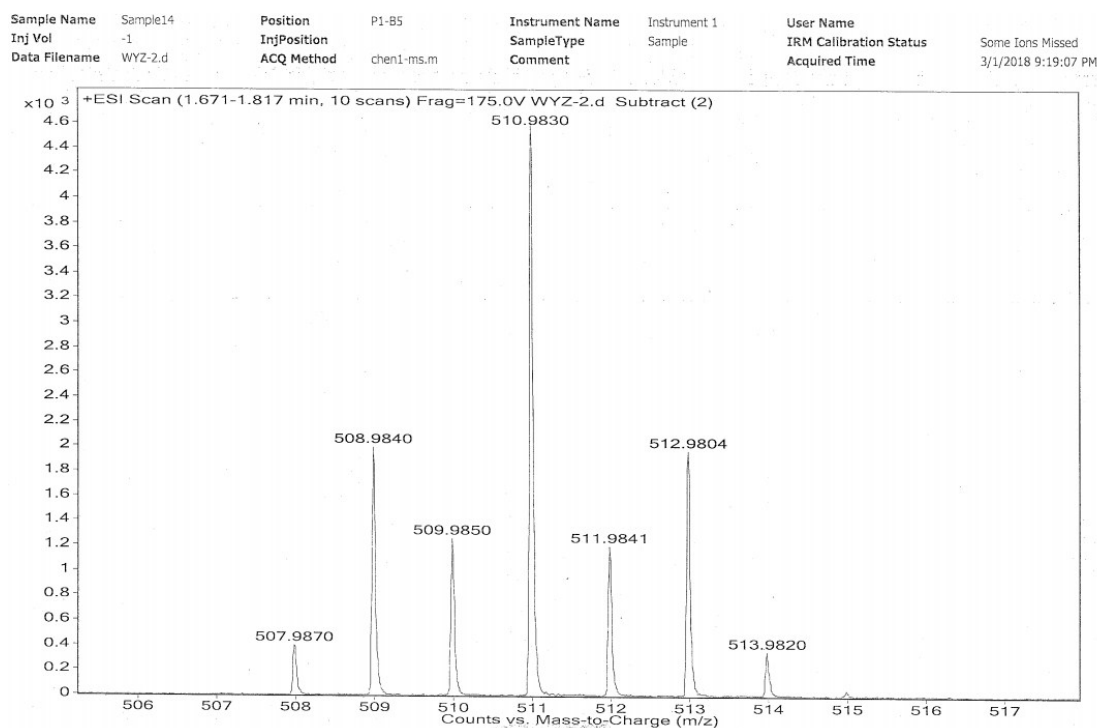

Fig. S2 Mass spectrum of B2

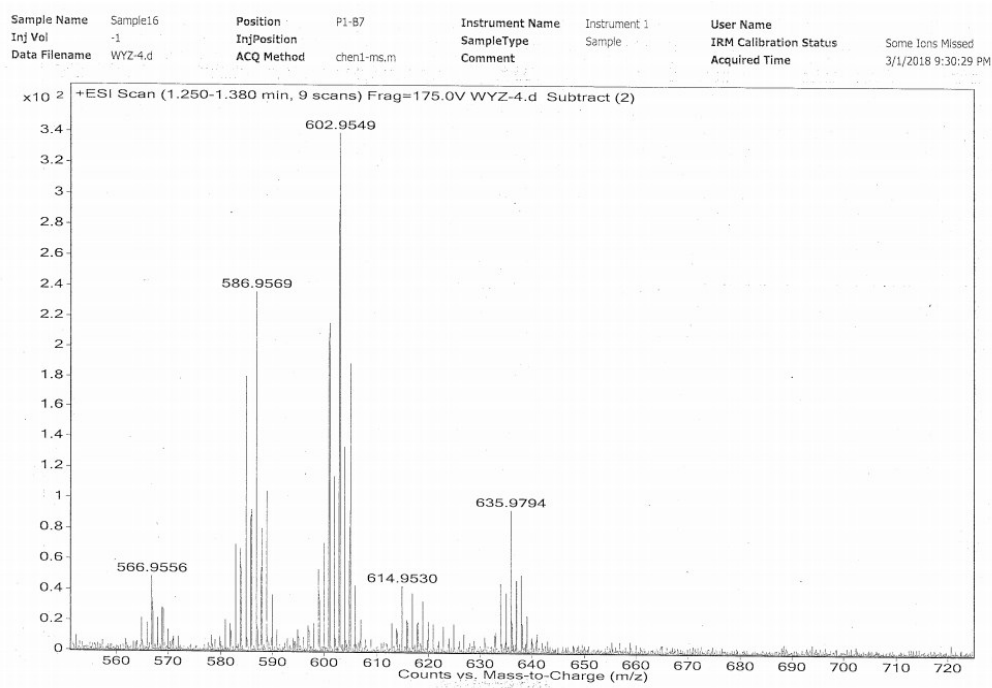

Fig. S3 Mass spectrum of BE

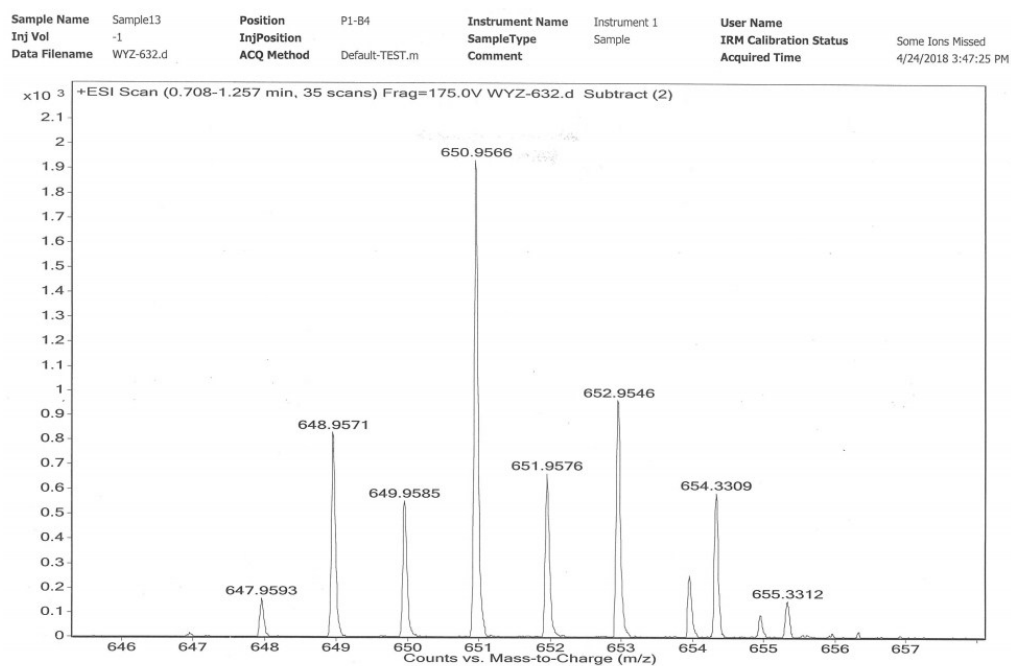

Fig. S4 Mass spectrum of BB

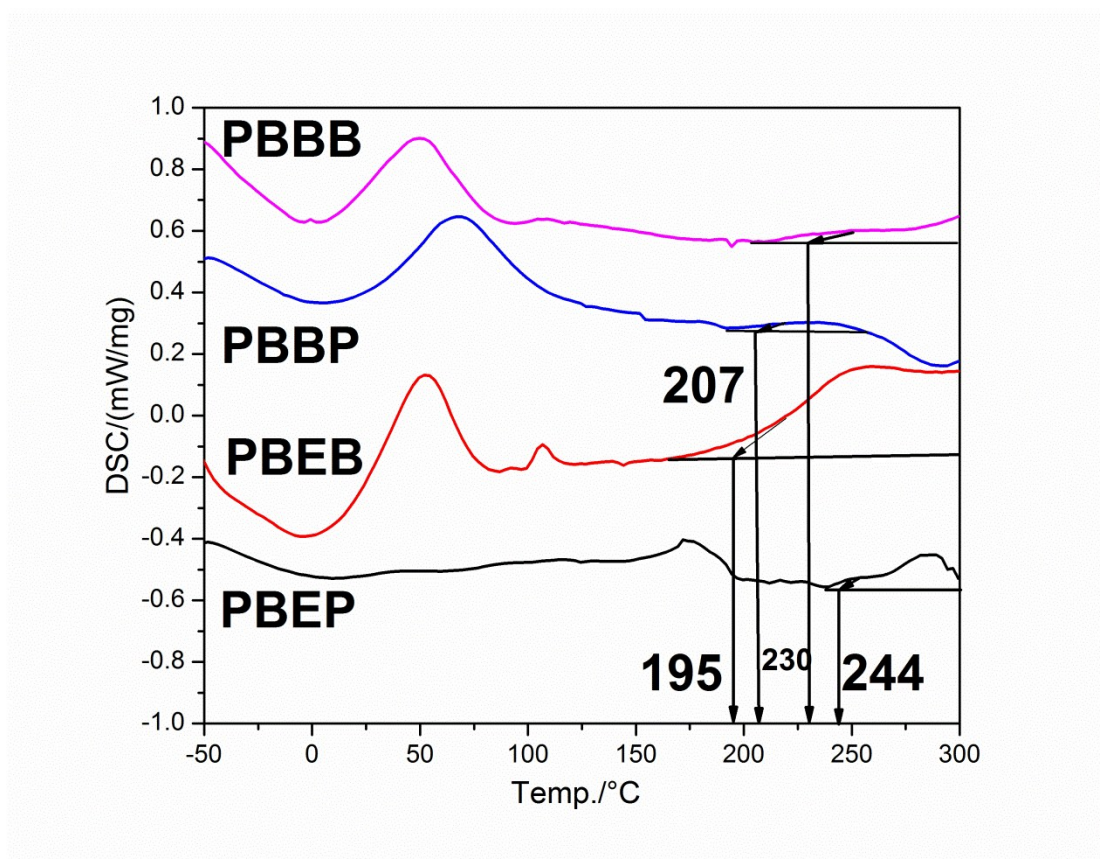

**Fig. S5** DSC curves of PBEP, PBEB, PBBP and PBBB

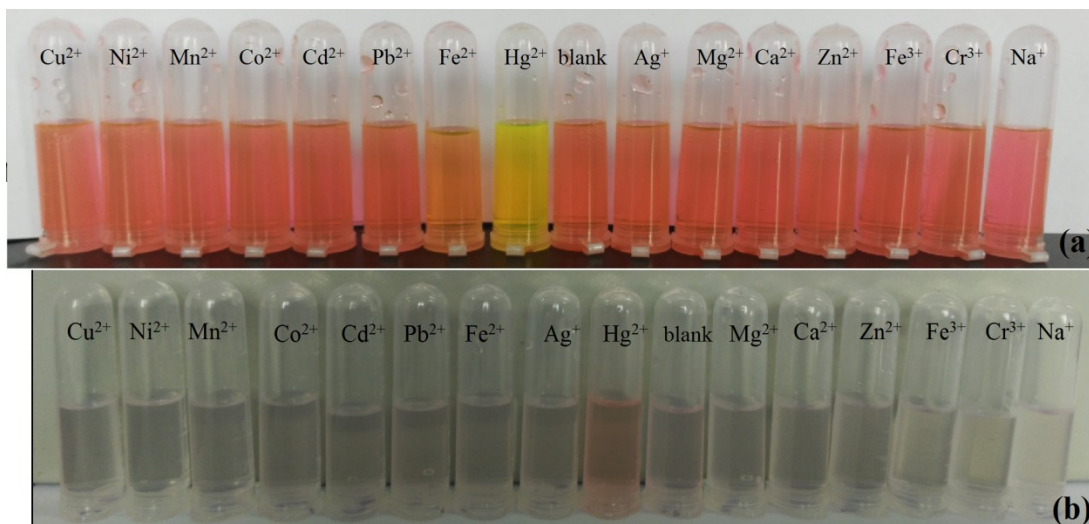

**Fig. S6** (a) images of **BE** (10  $\mu$ M) in DMF under natural light. (b) images of **BB** (1  $\mu$ M) in DMF under natural light.

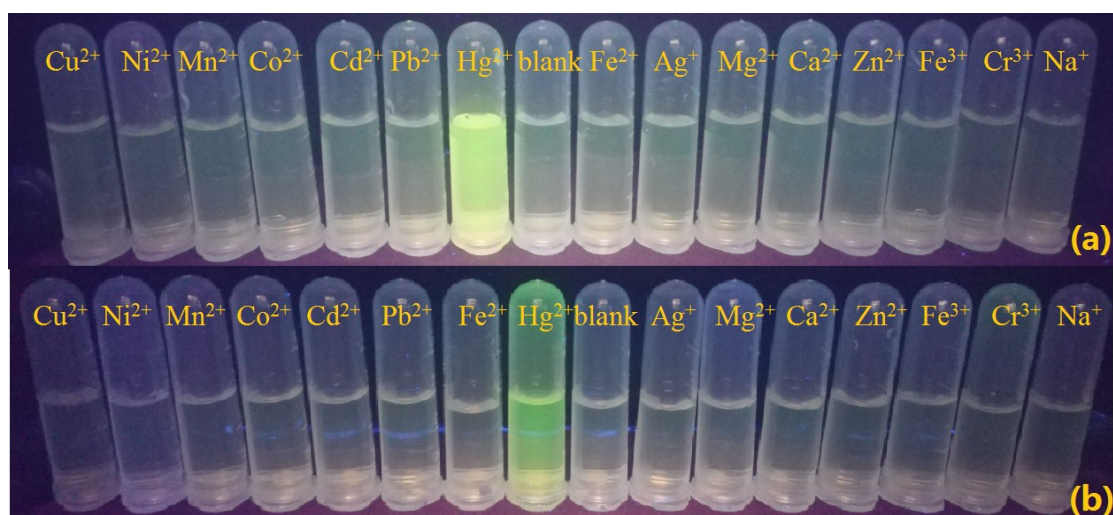

**Fig. S7** (a) images of BE (10  $\mu\text{M}$ ) in DMF under UV light (254 nm). (b) images of BB (1  $\mu\text{M}$ ) in DMF under UV light (254 nm).

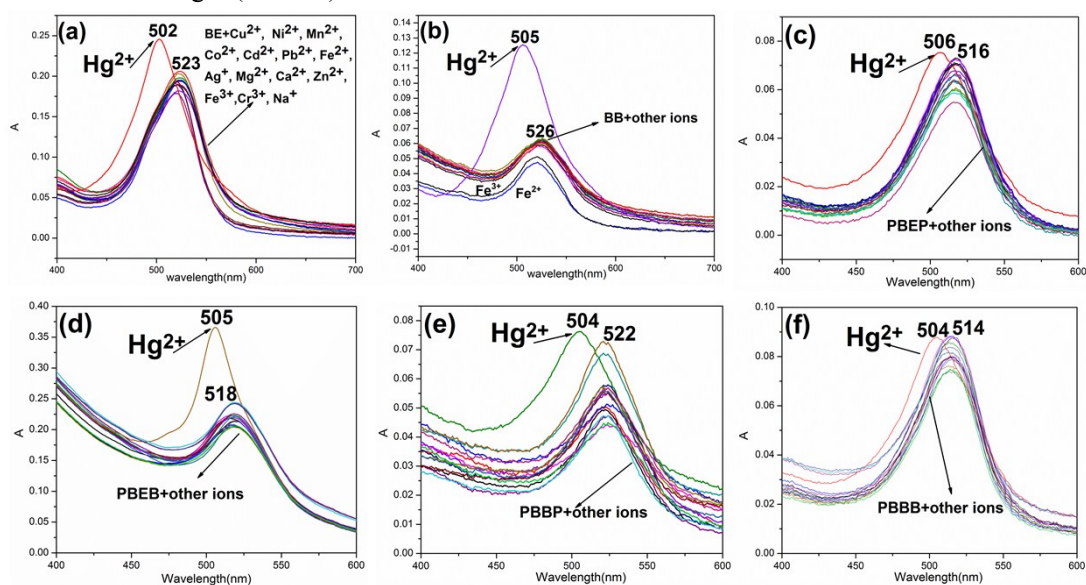

**Fig. S8.** UV-Vis spectra of (a) BE, (b) BB, (c) PBEP, (d) PBEB, (e) PBBP and (f) PBBB with different metals in DMF/water ( $v/v = 1/1$ ) (5  $\mu\text{M}$ ,  $\text{Cu}^{2+}$ ,  $\text{Hg}^{2+}$ ,  $\text{Ni}^{2+}$ ,  $\text{Mn}^{2+}$ ,  $\text{Co}^{2+}$ ,  $\text{Cd}^{2+}$ ,  $\text{Pb}^{2+}$ ,  $\text{Fe}^{2+}$ ,  $\text{Ag}^{+}$ ,  $\text{Mg}^{2+}$ ,  $\text{Ca}^{2+}$ ,  $\text{Zn}^{2+}$ ,  $\text{Fe}^{3+}$ ,  $\text{Cr}^{3+}$ ,  $\text{Na}^{+}$ )



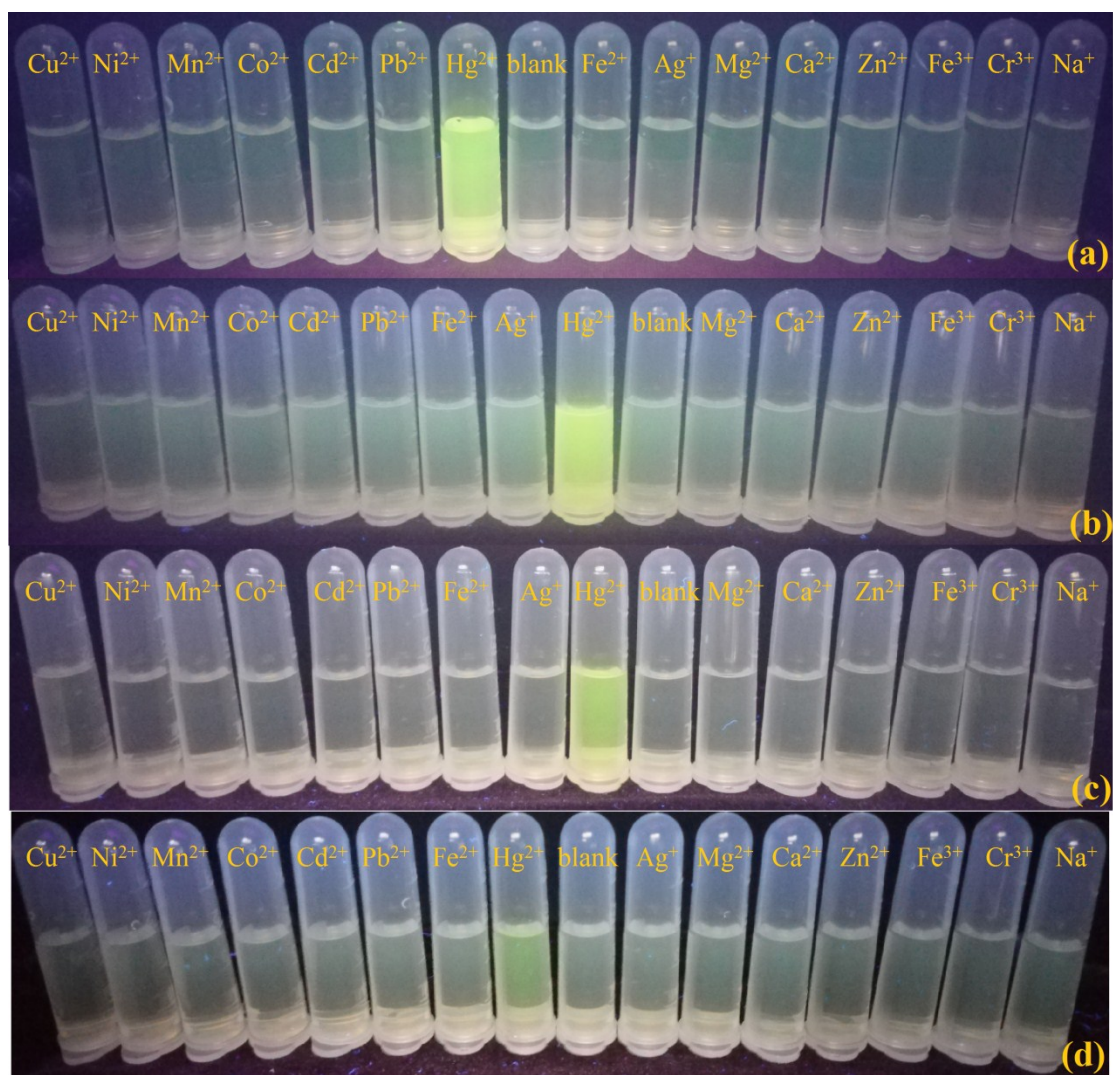

**Fig. S9** (a) images of PBEP (1  $\mu\text{M}$ ) in DMF under UV light (254 nm). (b) images of PBEB (1  $\mu\text{M}$ ) in DMF under UV light (254 nm). (c) images of PBBP (1  $\mu\text{M}$ ) in DMF under UV light (254 nm). (d) images of PBBB (1  $\mu\text{M}$ ) in DMF under UV light (254 nm).

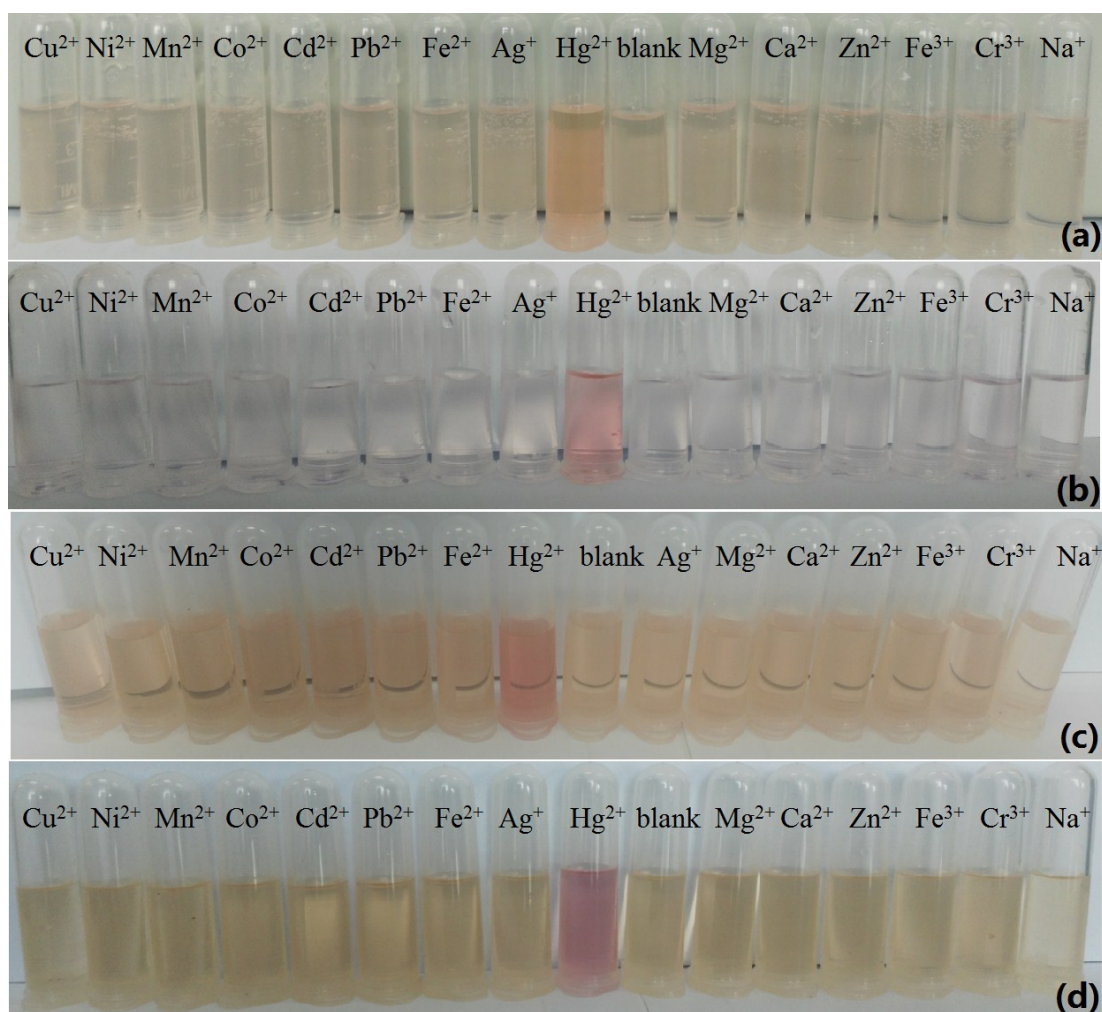

**Fig. S10** (a) images of PBEP (1  $\mu\text{M}$ ) in DMF under natural light. (b) images of PBEB (1  $\mu\text{M}$ ) in DMF under natural light. (c) images of PBBP (1  $\mu\text{M}$ ) in DMF under natural light. (d) images of PBBB (1  $\mu\text{M}$ ) in DMF under natural light.

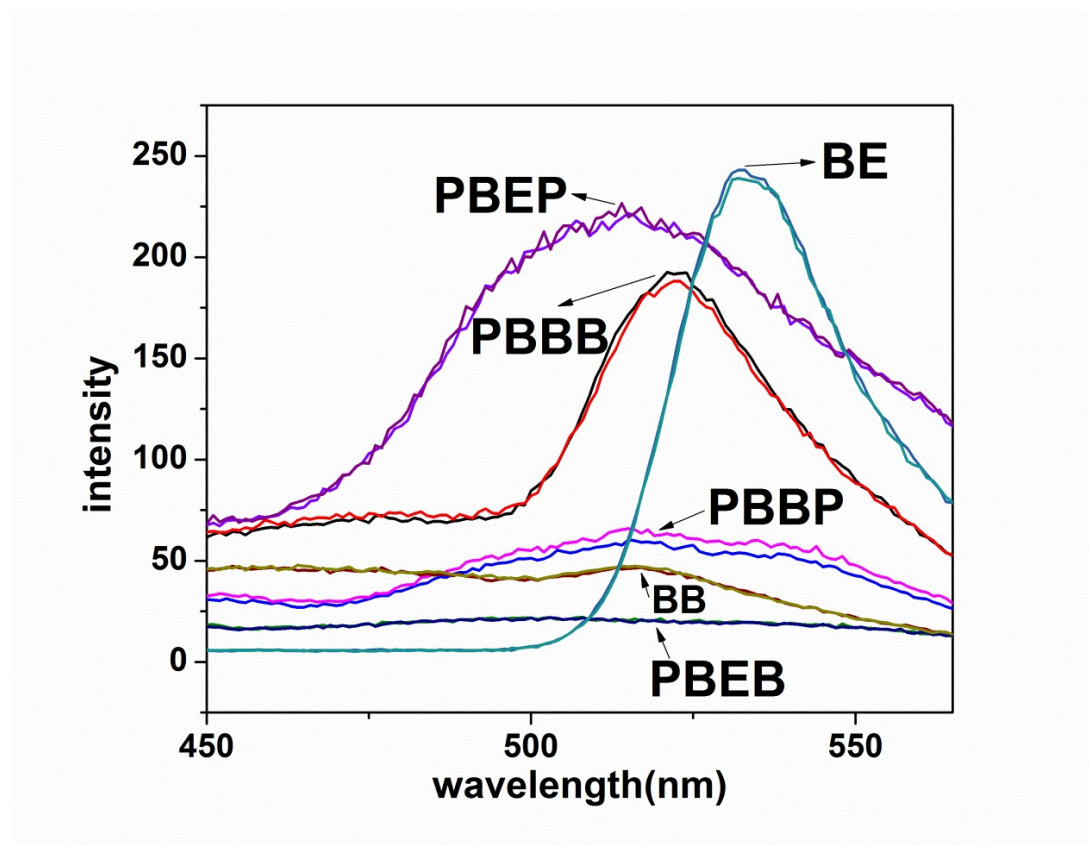

**Fig. S11** Fluorescent spectra of the DMF solutions of the studied chemosensors BE (10  $\mu\text{M}$ ), BB (1  $\mu\text{M}$ ), PBEP (10  $\mu\text{M}$ ), PBEB (1  $\mu\text{M}$ ), PBBP (10  $\mu\text{M}$ ), PBBB (1  $\mu\text{M}$ ) in the presence of pure water and natural lake water, when excited with light of  $\lambda_{\text{ex}}=360$  nm.

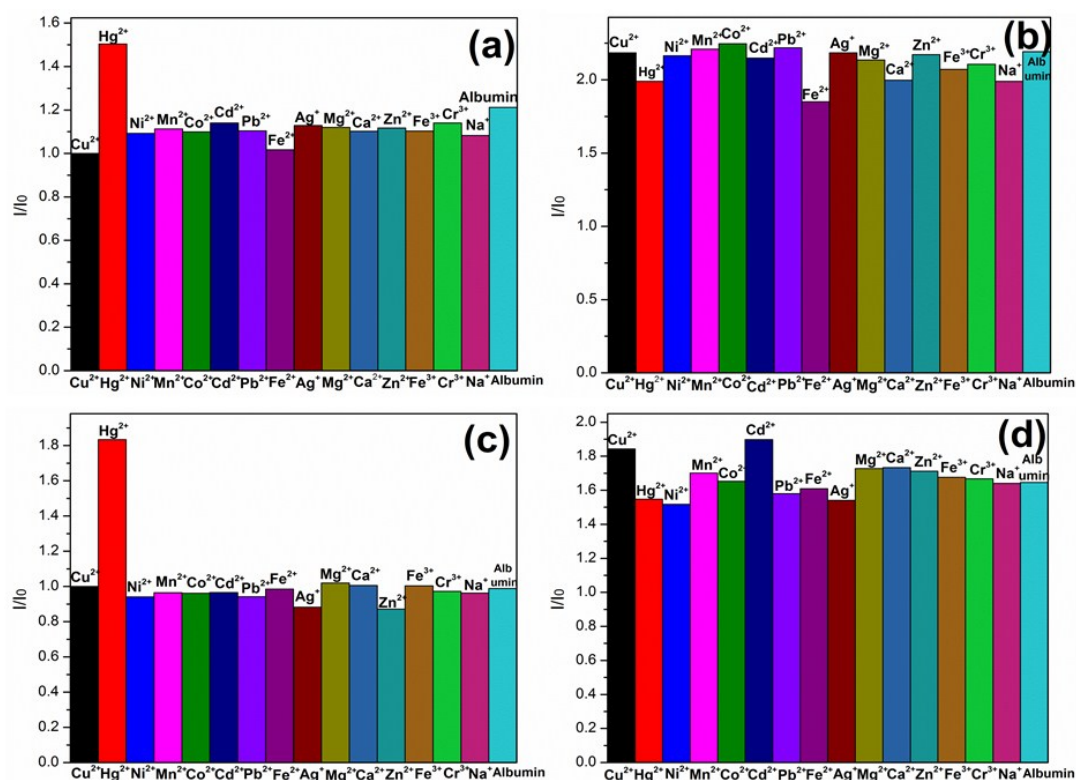

**Fig. S12** Fluorescent response of BE (10  $\mu\text{M}$ ) and BB (10  $\mu\text{M}$ ) with metal ions (100  $\mu\text{M}$ ) and albumin (0.5 mg/mL). (a) BE with single metal ions and albumin, (b) BE with other metal ions and albumin and  $\text{Hg}^{2+}$ , (c) BB with other metal ions and albumin, (d) BB with single metal ions and albumin and  $\text{Hg}^{2+}$ .
